# Supplementary material for: Identidad y educación en la Argentina
Source: Royal Society of Chemistry journal article supplement (doi:10.1039/d2ra02788g), 1993-01-01
Supplement: d2ra02788g1.pdf [file d2ra02788g1.pdf]

### Characterisation of rare earth elements and toxic heavy metals in coal and coal fly ash

Ilemona C. Okeme <sup>a\*</sup>, Richard A. Crane <sup>b</sup>, William Mark Nash <sup>b</sup>, Theophilus I. Ojonimi <sup>c</sup>, Thomas B. Scott <sup>d</sup>

<sup>a,d</sup> School of Physics, University of Bristol, HH Wills Physics Laboratory, Bristol, BS8 1TL, United Kingdom.

<sup>b</sup> Camborne School of Mines, College of Engineering, Mathematics and Physical Sciences, University of Exeter, UK; Environment and Sustainability Institute, University of Exeter, UK.

<sup>c</sup> Department of Mining Engineering, University of Jos, Jos, 930222, Nigeria.

**\* Corresponding author:**

Email: ilemona.okeme@gmail.com

Tel: +44 (0)7376625377

**Table S1:** Absolute values (mean  $\pm$  standard deviation; in mg.kg<sup>-1</sup>) of REEs in the various sequential extraction fractions for coal samples (OMC, OKC, ODC).

| Sample/<br>Fractions | La              | Ce               | Pr              | Nd              | Sm              | Y                | Eu              | Gd              | Tb              | Dy              | Ho              | Er              | Tm              | Yb              | Lu              |
|----------------------|-----------------|------------------|-----------------|-----------------|-----------------|------------------|-----------------|-----------------|-----------------|-----------------|-----------------|-----------------|-----------------|-----------------|-----------------|
| <b>OMC</b>           |                 |                  |                 |                 |                 |                  |                 |                 |                 |                 |                 |                 |                 |                 |                 |
| F1                   | 0.01 $\pm$ 0.00 | 0.01 $\pm$ 0.00  | 0.00            | 0.01 $\pm$ 0.00 | 0.00            | 0.01 $\pm$ 0.01  | 0.00            | 0.00            | 0.00            | 0.00            | 0.00            | 0.00            | 0.00            | 0.00            | 0.00            |
| F2                   | 0.82 $\pm$ 0.02 | 2.37 $\pm$ 0.06  | 0.33 $\pm$ 0.01 | 1.61 $\pm$ 0.04 | 0.33 $\pm$ 0.01 | 2.54 $\pm$ 0.07  | 0.08 $\pm$ 0.00 | 0.43 $\pm$ 0.01 | 0.06 $\pm$ 0.00 | 0.33 $\pm$ 0.01 | 0.06 $\pm$ 0.00 | 0.16 $\pm$ 0.01 | 0.02 $\pm$ 0.00 | 0.10 $\pm$ 0.00 | 0.01 $\pm$ 0.00 |
| F3                   | 2.41 $\pm$ 0.05 | 8.37 $\pm$ 0.18  | 1.34 $\pm$ 0.03 | 6.87 $\pm$ 0.15 | 1.77 $\pm$ 0.04 | 10.41 $\pm$ 0.26 | 0.42 $\pm$ 0.01 | 2.02 $\pm$ 0.06 | 0.30 $\pm$ 0.01 | 1.76 $\pm$ 0.05 | 0.35 $\pm$ 0.01 | 0.89 $\pm$ 0.03 | 0.11 $\pm$ 0.00 | 0.65 $\pm$ 0.02 | 0.09 $\pm$ 0.00 |
| F4                   | 3.42 $\pm$ 0.07 | 8.00 $\pm$ 0.20  | 0.89 $\pm$ 0.02 | 3.30 $\pm$ 0.07 | 0.61 $\pm$ 0.01 | 1.40 $\pm$ 0.03  | 0.11 $\pm$ 0.00 | 0.49 $\pm$ 0.01 | 0.06 $\pm$ 0.00 | 0.33 $\pm$ 0.01 | 0.06 $\pm$ 0.00 | 0.14 $\pm$ 0.00 | 0.02 $\pm$ 0.00 | 0.09 $\pm$ 0.04 | 0.01 $\pm$ 0.00 |
| <b>Total</b>         | <b>6.66</b>     | <b>18.75</b>     | <b>2.56</b>     | <b>11.79</b>    | <b>2.71</b>     | <b>14.36</b>     | <b>0.62</b>     | <b>2.94</b>     | <b>0.43</b>     | <b>2.42</b>     | <b>0.47</b>     | <b>1.20</b>     | <b>0.15</b>     | <b>0.83</b>     | <b>0.11</b>     |
| <b>OKC</b>           |                 |                  |                 |                 |                 |                  |                 |                 |                 |                 |                 |                 |                 |                 |                 |
| F1                   | 0.11 $\pm$ 0.01 | 0.17 $\pm$ 0.01  | 0.02 $\pm$ 0.00 | 0.09 $\pm$ 0.01 | 0.01 $\pm$ 0.00 | 0.07 $\pm$ 0.01  | 0.00            | 0.02 $\pm$ 0.00 | 0.00            | 0.01 $\pm$ 0.00 | 0.00            | 0.00            | 0.00            | 0.00            | 0.00            |
| F2                   | 0.71 $\pm$ 0.04 | 1.35 $\pm$ 0.10  | 0.14 $\pm$ 0.01 | 0.56 $\pm$ 0.05 | 0.10 $\pm$ 0.01 | 0.58 $\pm$ 0.05  | 0.03 $\pm$ 0.00 | 0.12 $\pm$ 0.01 | 0.02 $\pm$ 0.00 | 0.01 $\pm$ 0.01 | 0.02 $\pm$ 0.00 | 0.05 $\pm$ 0.00 | 0.01 $\pm$ 0.00 | 0.03 $\pm$ 0.00 | 0.00            |
| F3                   | 4.56 $\pm$ 0.10 | 10.24 $\pm$ 0.24 | 1.23 $\pm$ 0.02 | 5.05 $\pm$ 0.13 | 1.07 $\pm$ 0.03 | 5.45 $\pm$ 0.1   | 0.26 $\pm$ 0.01 | 1.14 $\pm$ 0.02 | 0.17 $\pm$ 0.00 | 0.95 $\pm$ 0.02 | 0.19 $\pm$ 0.00 | 0.49 $\pm$ 0.01 | 0.06 $\pm$ 0.00 | 0.37 $\pm$ 0.01 | 0.05 $\pm$ 0.00 |
| F4                   | 2.32 $\pm$ 0.08 | 4.79 $\pm$ 0.16  | 0.52 $\pm$ 0.02 | 1.94 $\pm$ 0.08 | 0.35 $\pm$ 0.02 | 0.94 $\pm$ 0.03  | 0.07 $\pm$ 0.00 | 0.31 $\pm$ 0.01 | 0.04 $\pm$ 0.00 | 0.20 $\pm$ 0.00 | 0.04 $\pm$ 0.00 | 0.09 $\pm$ 0.00 | 0.01 $\pm$ 0.00 | 0.06 $\pm$ 0.00 | 0.01 $\pm$ 0.00 |
| <b>Total</b>         | <b>7.71</b>     | <b>16.56</b>     | <b>1.91</b>     | <b>7.64</b>     | <b>1.54</b>     | <b>7.04</b>      | <b>0.36</b>     | <b>1.59</b>     | <b>0.22</b>     | <b>1.25</b>     | <b>0.24</b>     | <b>0.63</b>     | <b>0.08</b>     | <b>0.46</b>     | <b>0.06</b>     |
| <b>ODC</b>           |                 |                  |                 |                 |                 |                  |                 |                 |                 |                 |                 |                 |                 |                 |                 |

|              |              |              |             |              |             |             |             |             |             |             |             |             |             |             |             |
|--------------|--------------|--------------|-------------|--------------|-------------|-------------|-------------|-------------|-------------|-------------|-------------|-------------|-------------|-------------|-------------|
| F1           | 0.08 ± 0.01  | 0.13 ± 0.03  | 0.01 ± 0.00 | 0.06 ± 0.01  | 0.01 ± 0.00 | 0.09 ± 0.03 | 0.00        | 0.01 ± 0.00 | 0.00        | 0.01 ± 0.00 | 0.00        | 0.00        | 0.00        | 0.00        | 0.00        |
| F2           | 1.52 ± 0.06  | 2.93 ± 0.11  | 0.32 ± 0.01 | 1.29 ± 0.04  | 0.23 ± 0.01 | 1.71 ± 0.05 | 0.06 ± 0.00 | 0.29 ± 0.01 | 0.04 ± 0.00 | 0.24 ± 0.01 | 0.05 ± 0.00 | 0.13 ± 0.00 | 0.02 ± 0.00 | 0.08 ± 0.00 | 0.01 ± 0.00 |
| F3           | 4.45 ± 0.06  | 10.43 ± 0.14 | 1.24 ± 0.01 | 5.11 ± 0.04  | 1.07 ± 0.01 | 6.24 ± 0.10 | 0.27 ± 0.01 | 1.16 ± 0.02 | 0.17 ± 0.00 | 1.04 ± 0.02 | 0.21 ± 0.00 | 0.58 ± 0.01 | 0.08 ± 0.00 | 0.45 ± 0.01 | 0.07 ± 0.00 |
| F4           | 6.02 ± 0.15  | 13.81 ± 0.36 | 1.47 ± 0.04 | 5.22 ± 0.14  | 0.91 ± 0.02 | 1.73 ± 0.04 | 0.18 ± 0.01 | 0.70 ± 0.01 | 0.09 ± 0.00 | 0.43 ± 0.01 | 0.07 ± 0.00 | 0.16 ± 0.01 | 0.02 ± 0.00 | 0.10 ± 0.00 | 0.01 ± 0.00 |
| <b>Total</b> | <b>12.08</b> | <b>27.29</b> | <b>3.04</b> | <b>11.68</b> | <b>2.22</b> | <b>9.77</b> | <b>0.51</b> | <b>2.16</b> | <b>0.30</b> | <b>1.71</b> | <b>0.33</b> | <b>0.88</b> | <b>0.11</b> | <b>0.64</b> | <b>0.09</b> |

F1: Acid Soluble Fraction; F2: Reducible Fraction; F3: Oxidisable Fraction; F4: Residual Fraction.

OMC: Omelewu Coal

OKC: Okaba Coal

ODC: Odagbo Coal

**Table S2:** Absolute values (mean  $\pm$  standard deviation; in mg.kg<sup>-1</sup>) of toxic heavy metals in the various sequential extraction fractions for both coal and simulant fly ash samples (OMC, OMA, OKC, OKA, ODC and ODA).

| Sample/Fractions | Cr               | As              | Pb              | Cd                 | Th                | U                |
|------------------|------------------|-----------------|-----------------|--------------------|-------------------|------------------|
| <b>OMC</b>       |                  |                 |                 |                    |                   |                  |
| F1               | 0.15 $\pm$ 0.05  | 0.12 $\pm$ 0.04 | 0.36 $\pm$ 0.00 | 0.01 $\pm$ 0.00    | 0.001 $\pm$ 0.00  | 0.002 $\pm$ 0.00 |
| F2               | 0.19 $\pm$ 0.05  | 0.59 $\pm$ 0.03 | 2.30 $\pm$ 0.36 | 0.02 $\pm$ 0.00    | 0.0003 $\pm$ 0.00 | 0.004 $\pm$ 0.00 |
| F3               | 23.82 $\pm$ 0.59 | 0.42 $\pm$ 0.04 | 4.75 $\pm$ 0.17 | 0.04 $\pm$ 0.00    | 2.69 $\pm$ 0.08   | 1.20 $\pm$ 0.04  |
| F4               | 0.76 $\pm$ 0.09  | 0               | 1.62 $\pm$ 0.09 | 0.001 $\pm$ 0.00   | 1.85 $\pm$ 0.02   | 0.18 $\pm$ 0.00  |
| <b>Total</b>     | <b>24.92</b>     | <b>1.14</b>     | <b>9.02</b>     | <b>0.07</b>        | <b>4.54</b>       | <b>1.39</b>      |
| <b>OMA</b>       |                  |                 |                 |                    |                   |                  |
| F1               | 0.10 $\pm$ 0.03  | 2.53 $\pm$ 0.09 | 0.47 $\pm$ 0.22 | 0.004 $\pm$ 0.00   | 0.007 $\pm$ 0.00  | 0.03 $\pm$ 0.01  |
| F2               | 0.15 $\pm$ 0.02  | 1.03 $\pm$ 0.14 | 0.68 $\pm$ 0.15 | 0.001 $\pm$ 0.00   | 0.001 $\pm$ 0.00  | 0.001 $\pm$ 0.00 |
| F3               | 0.75 $\pm$ 0.27  | 0.55 $\pm$ 0.16 | 0.68 $\pm$ 0.16 | 0.02.11 $\pm$ 0.00 | 0.12 $\pm$ 0.01   | 0.24 $\pm$ 0.02  |
| F4               | 5.00 $\pm$ 0.57  | 0.27 $\pm$ 0.08 | 0.48 $\pm$ 0.13 | 0.004 $\pm$ 0.00   | 3.09 $\pm$ 0.29   | 0.32 $\pm$ 0.03  |
| <b>Total</b>     | <b>5.97</b>      | <b>4.38</b>     | <b>2.31</b>     | <b>0.03</b>        | <b>3.21</b>       | <b>0.59</b>      |
| <b>OKC</b>       |                  |                 |                 |                    |                   |                  |
| F1               | 0.12 $\pm$ 0.02  | 0.39 $\pm$ 0.07 | 0.15 $\pm$ 0.07 | 0.006 $\pm$ 0.00   | 0.002 $\pm$ 0.00  | 0.00             |
| F2               | 0.15 $\pm$ 0.05  | 0.55 $\pm$ 0.02 | 0.86 $\pm$ 0.13 | 0.007 $\pm$ 0.00   | 0.00              | 0.00             |
| F3               | 9.11 $\pm$ 0.17  | 0.49 $\pm$ 0.01 | 3.14 $\pm$ 0.12 | 0.04 $\pm$ 0.00    | 1.25 $\pm$ 0.06   | 0.41 $\pm$ 0.01  |
| F4               | 0.70 $\pm$ 0.38  | 0               | 0.50 $\pm$ 0.03 | 0.001 $\pm$ 0.00   | 0.70 $\pm$ 0.05   | 0.07 $\pm$ 0.00  |
| <b>Total</b>     | <b>10.08</b>     | <b>1.43</b>     | <b>4.65</b>     | <b>0.05</b>        | <b>1.95</b>       | <b>0.48</b>      |
| <b>OKA</b>       |                  |                 |                 |                    |                   |                  |
| F1               | 0.36 $\pm$ 0.04  | 7.46 $\pm$ 0.46 | 0.38 $\pm$ 0.09 | 0.01 $\pm$ 0.00    | 0.01 $\pm$ 0.00   | 0.06 $\pm$ 0.01  |
| F2               | 0.15 $\pm$ 0.01  | 4.79 $\pm$ 0.05 | 0.18 $\pm$ 0.07 | 0.002 $\pm$ 0.00   | 0.0002 $\pm$ 0.00 | 0.004 $\pm$ 0.00 |

|              |              |              |             |               |              |              |
|--------------|--------------|--------------|-------------|---------------|--------------|--------------|
| F3           | 0.67 ± 0.08  | 1.90 ± 0.14  | 0.60 ± 0.15 | 0.02 ± 0.00   | 0.80 ± 0.05  | 0.67 ± 0.04  |
| F4           | 11.50 ± 0.90 | 2.03 ± 0.38  | 1.84 ± 0.01 | 0.01 ± 0.00   | 6.85 ± 0.24  | 1.23 ± 0.07  |
| <b>Total</b> | <b>12.68</b> | <b>16.18</b> | <b>2.99</b> | <b>0.04</b>   | <b>7.66</b>  | <b>1.97</b>  |
| <b>ODC</b>   |              |              |             |               |              |              |
| F1           | 0.09 ± 0.00  | 0.31 ± 0.06  | 0.33 ± 0.09 | 0.01 ± 0.7    | 0.004 ± 0.01 | 0.003 ± 0.00 |
| F2           | 0.13 ± 0.02  | 0.51 ± 0.07  | 1.53 ± 0.08 | 0.005 ± 0.00  | 0.003 ± 0.00 | 0.003 ± 0.00 |
| F3           | 12.06 ± 0.16 | 0.54 ± 0.02  | 4.76 ± 0.04 | 0.04 ± 0.00   | 1.43 ± 0.01  | 0.47 ± 0.01  |
| F4           | 0.56 ± 0.01  | 0.00         | 1.24 ± 0.02 | 0.002 ± 0.00  | 1.61 ± 0.03  | 0.13 ± 0.004 |
| <b>Total</b> | <b>12.84</b> | <b>1.36</b>  | <b>7.86</b> | <b>0.05</b>   | <b>3.05</b>  | <b>0.61</b>  |
| <b>ODA</b>   |              |              |             |               |              |              |
| F1           | 0.68 ± 0.02  | 13.21 ± 0.20 | 0.33 ± 0.15 | 0.01 ± 0.004  | 0.012 ± 0.00 | 0.29 ± 0.00  |
| F2           | 0.24 ± 0.15  | 4.65 ± 0.30  | 0.27 ± 0.05 | 0.002 ± 0.000 | 0.004 ± 0.00 | 0.014 ± 0.00 |
| F3           | 0.74 ± 0.07  | 2.27 ± 0.19  | 1.25 ± 0.04 | 0.02 ± 0.00   | 0.72 ± 0.03  | 0.78 ± 0.05  |
| F4           | 14.90 ± 0.86 | 2.00 ± 0.10  | 6.79 ± 0.30 | 0.01 ± 0.00   | 6.43 ± 0.41  | 1.21 ± 0.08  |
| <b>Total</b> | <b>16.56</b> | <b>22.14</b> | <b>8.64</b> | <b>0.04</b>   | <b>7.16</b>  | <b>2.29</b>  |

OMA: Omelewu simulant fly ash; OMC: Omelewu Coal

OKA: Okaba simulant fly ash; OKC: Okaba Coal

ODA: Odagbo simulant fly ash; ODC: Odagbo Coal
